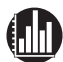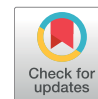

# The Bihormonal Bionic Pancreas Improves Glycemic Control in Individuals With Hyperinsulinism and Postpancreatectomy Diabetes: A Pilot Study

Arpana Rayannavar,<sup>1</sup> Lauren M. Mitteer,<sup>1</sup> Courtney A. Balliro,<sup>2</sup> Firas H. El-Khatib,<sup>3</sup> Katherine L. Lord,<sup>1,4</sup> Colin P. Hawkes,<sup>1,4</sup> Lance S. Ballester,<sup>5</sup> Edward R. Damiano,<sup>3</sup> Steven J. Russell,<sup>2</sup> and Diva D. De León<sup>1,4</sup>

*Diabetes Care* 2021;44:2582–2585 | <https://doi.org/10.2337/dc21-0416>

## OBJECTIVE

To determine whether the bihormonal bionic pancreas (BHBP) improves glycemic control and reduces hypoglycemia in individuals with congenital hyperinsulinism (HI) and postpancreatectomy diabetes (PPD) compared with usual care (UC).

## RESEARCH DESIGN AND METHODS

Ten subjects with HI and PPD completed this open-label, crossover pilot study. Coprimary outcomes were mean glucose concentration and time with continuous glucose monitoring (CGM) glucose concentration <3.3 mmol/L.

## RESULTS

Mean (SD) CGM glucose concentration was 8.3 (0.7) mmol/L in the BHBP period versus 9 (1.8) mmol/L in the UC period ( $P = 0.13$ ). Mean (SD) time with CGM glucose concentration <3.3 mmol/L was 0% (0.002) in the BHBP period vs. 1.3% (0.018) in the UC period ( $P = 0.11$ ).

## CONCLUSIONS

Relative to UC, the BHBP resulted in comparable glycemic control in our population.

Diffuse congenital hyperinsulinism often requires palliative near-total pancreatectomy (1), which results in postpancreatectomy diabetes (PPD), glucagon deficiency, and pancreatic insufficiency; specifically, the clinical evolution of PPD is gradual and characterized by marked fluctuations between clinically significant hypo- and hyperglycemia due to dysregulation of residual endogenous insulin and glucagon secretion (2–4). The bihormonal bionic pancreas (BHBP) has been shown to improve glycemic control and to reduce the frequency of hypoglycemia in individuals with type 1 diabetes (5–8) by autonomously administering insulin and glucagon based on plasma glucose (PG) levels detected via continuous glucose monitoring (CGM) system. Given that individuals with HI and PPD have both insulin and glucagon deficiency, we hypothesize that, when compared with current standard diabetes care,

<sup>1</sup>Division of Endocrinology and Diabetes, The Children's Hospital of Philadelphia, Philadelphia, PA

<sup>2</sup>Diabetes Research Center and Department of Medicine, Massachusetts General Hospital and Harvard Medical School, Boston, MA

<sup>3</sup>Department of Biomedical Engineering, Boston University, Boston, MA

<sup>4</sup>Department of Pediatrics, Perelman School of Medicine at the University of Pennsylvania, Philadelphia, PA

<sup>5</sup>Biostatistics and Data Management Core, The Children's Hospital of Philadelphia, Philadelphia, PA

Corresponding author: Diva D. De León, [deleon@chop.edu](mailto:deleon@chop.edu)

Received 19 February 2021 and accepted 2 August 2021

Clinical trial reg. no. NCT03303196, [clinicaltrials.gov](https://clinicaltrials.gov)

This article contains supplementary material online at <https://doi.org/10.2337/figshare.15117573>.

© 2021 by the American Diabetes Association. Readers may use this article as long as the work is properly cited, the use is educational and not for profit, and the work is not altered. More information is available at <https://www.diabetesjournals.org/content/license>.

the BHBP would reduce the mean glucose concentration and the fraction of time with glucose concentrations <3.3 mmol/L.

**RESEARCH DESIGN AND METHODS**

This random-order, crossover pilot study included 10 participants with HI and PPD. Participants completed two, unblinded, 3-night inpatient admissions in random order during which they used the BHBP (“BHPB period”) or their own insulin pump (“UC period”).

**Procedures**

The BHBP prototype used in this study consisted of an iPhone 6S running a mathematical dosing algorithm in the Beta Bionics mobile application, a Dexcom G5 CGM system, and two Tandem t:slim infusion pumps. The Beta Bionics app received CGM glucose values and

communicated via Bluetooth with two t:slim pumps, one filled with insulin and the other with glucagon. The algorithm calculated doses of insulin or glucagon every 5 min based on CGM readings and then communicated with the pump to administer the dose. The BHBP was initialized using only the participant’s body weight.

Fingersticks (reported by the glucose meter as plasma glucose [PG]) were done twice daily to calibrate the CGM, before meals, at bedtime, at 0300 h, and as-needed for reported symptoms of hypoglycemia or if the CGM glucose was <2.8 mmol/L. Participants completed a visual analog scale (VAS) every day to measure nausea.

**Outcomes**

Coprietary efficacy outcomes were mean CGM glucose concentration and the mean

proportion of time that the CGM glucose concentration was <3.3 mmol/L during days 2 and 3 in each period (days 2 and 3 are expected to be more representative of long-term system performance) (5,6,8).

Secondary efficacy outcomes included the proportion of time that CGM glucose concentrations were in clinically relevant ranges (<2.8 mmol/L, <3.3 mmol/L, <3.9 mmol/L, 3.9–6.7 mmol/L, 3.9–10 mmol/L, >10 mmol/L, or >13.9 mmol/L), the percentage of subjects with mean CGM glucose concentration <8.6 mmol/L (estimated average glucose corresponding to a HbA<sub>1c</sub> of 7% [53 mmol/mol]), and percentage of fingerstick PG values <3.9 mmol/L, <3.3 mmol/L, and <2.8 mmol/L.

Safety outcomes were number of symptomatic hypoglycemia episodes, number of carbohydrates interventions, insulin total daily dose (TDD), glucagon TDD during the

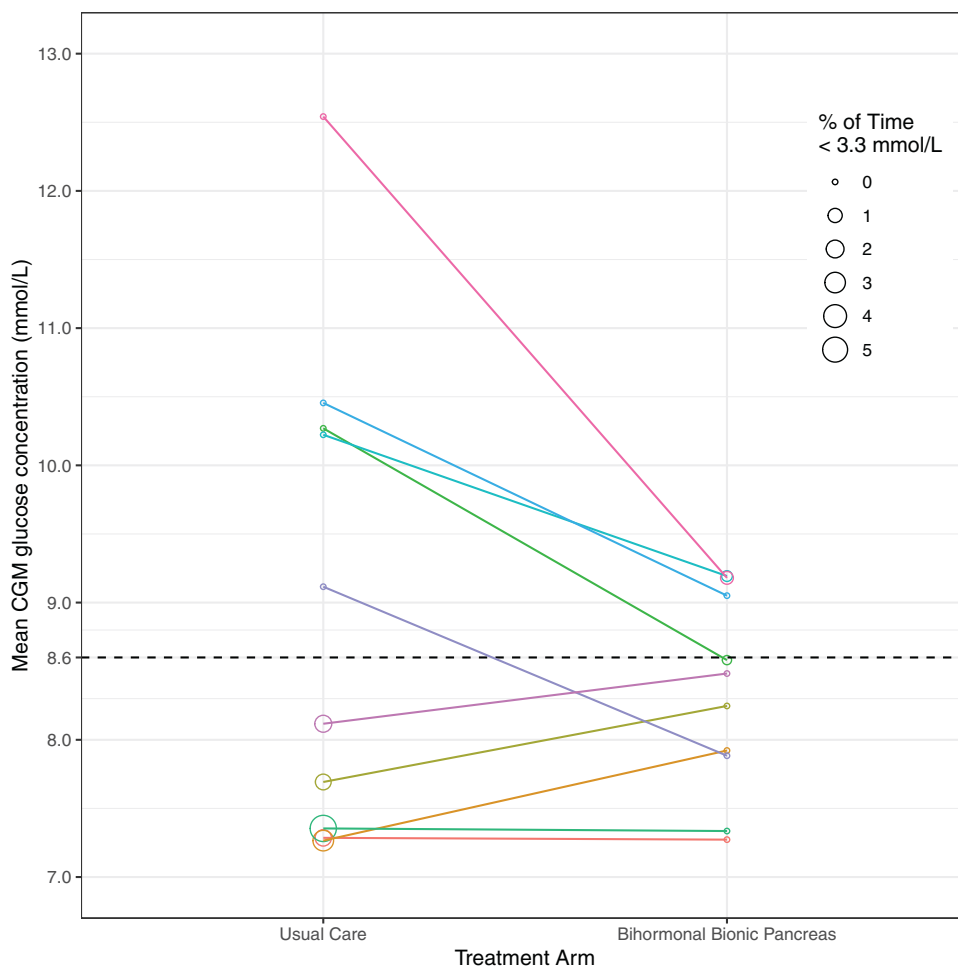

**Figure 1**—Comparison of mean CGM glucose concentration and frequency of hypoglycemia (<3.3 mmol/L) between UC and BHBP periods. Mean CGM glucose concentration in each participant on day 2 and 3 of the UC period is connected by a line to the corresponding mean CGM glucose concentration during the BHBP period. The diameter of each circle is proportional to the percentage of time that the subject spent with a CGM glucose concentration <3.3 mmol/L.

BHBP period, fraction of time BHBP was not functioning properly, and the mean daily VAS nausea score.

### Statistical Analyses

This was a pilot study to assess the feasibility of using the BHBP to manage glycemia in individuals with HI and PPD and, as such, was underpowered to detect differences between periods for many outcome measures.

Data were primarily analyzed by first being aggregated to summary measures for each period and tested using the Wilcoxon paired signed rank test. Non-missing time points were aggregated to proportions and means for binary and continuous variables, respectively.

For modeling, generalized estimating equations were used with compound symmetry assumed between records for the same patient. CGM values were analyzed using Gaussian distributed to estimate mean difference. The ranges of CGM were analyzed using a binomial distribution with log link to estimate relative risks. Modeling was done on the individual time points to avoid bias of aggregation and was adjusted for HbA<sub>1c</sub>, age at enrollment, and sex. Analyses were generated using SAS 9.4 software.

### RESULTS

Ten participants with HI (ages 7–26 years; 50% female) and on insulin pump therapy for management of their PPD completed this study. Participants were heterogeneous with respect to age, BMI, insulin requirements, and diabetes control. Participants' insulin requirements at home ranged from 0.23 to 1.26 units/kg/day.

The mean CGM glucose concentration was not significantly different between the BHBP and UC periods (8.3 mmol/L [SD 0.71] vs. 9 mmol/L [SD 1.79];  $P = 0.13$ ) nor was the mean percentage of time with CGM glucose concentration  $<3.3$  mmol/L (0% [SD 0.23] vs. 1.3% [SD 1.9];  $P = 0.11$ ). The mean percentage of time with CGM glucose  $<3.9$  mmol/L was 0.53% (SD 0.65) during the BHBP and 3.0% (SD 3.24) during the UC period ( $P = 0.0547$ ).

The percentage of subjects that had a mean CGM glucose concentration  $<8.6$  mmol/L during the BHBP and UC periods was not statistically different ( $P = 0.16$ )

(Fig. 1). Compared with the UC period, subjects spent significantly more time with CGM glucose in range 3.9–10 mmol/L (78.0% [SD 10.5] vs. 59.8% [SD 17.3];  $P = 0.002$ ) and less time with CGM glucose concentration  $\geq 10$  mmol/L while on the BHBP (21.3% [SD 10.2] vs. 37.1% [SD 19.3];  $P = 0.004$ ) (Supplementary Fig. 1). When adjusted for HbA<sub>1c</sub>, age at enrollment, and sex using the generalized estimating equation, the risk of spending a time point with CGM  $<3.3$  mmol/L or  $<3.9$  mmol/L or  $\geq 10$  mmol/L was significantly lower in the BHBP period than in the UC period. Mean PG concentration from fingerstick measurements (8.8 mmol/L [SD 1.32] vs. 9 mmol/L [SD 2.37],  $P = 0.62$ ) and the number of fingerstick hypoglycemia episodes were not significantly different between the BHBP and UC periods.

The total number of interventions required for symptomatic hypoglycemia was higher in the UC period than in the BHBP period (5 vs. 0). The TDD of insulin was not different between BHBP and UC periods (0.649 vs. 0.767 units/kg/day;  $P = 0.3$ ). Mean TDD of glucagon administered by the BHBP was 3.52  $\mu\text{g}/\text{kg}/\text{day}$  (SD 1.44). During the BHBP analysis period, subjects were administered an average of 36.4 (median, 36.5; range, 23–50) doses of glucagon total.

The median nausea scores were not significantly different between the two periods ( $P = 0.0625$ ). The only other adverse events reported were headaches.

### CONCLUSIONS

While not all of our outcomes showed significant differences due to small sample size, they demonstrated a trend toward an overall improvement of mean glucose and frequency of hypoglycemia in the BHBP period relative to the UC period, consistent with previous studies in individuals with type 1 diabetes (6–8).

As seen in Fig. 1, during UC, subjects with lower mean glucose tended to have a higher frequency of hypoglycemia than those with higher mean glucose. Remarkably, despite subject heterogeneity, time spent in range (3.9–10 mmol/L) was significantly higher among participants during the BHBP period. Additionally, no severe hypoglycemia ( $<2.8$  mmol/L) was detected by CGM for any subject in the BHBP period. This is important, because fear of hypoglycemia strongly influences

when insulin therapy is initiated and how strict glycemic control parameters are enforced by parents/patients and physicians.

Limitations of this study include the small sample size, which may have limited our ability to demonstrate statistically significant differences in the two coprimary outcomes, and the use of a prototype version of the BHBP that relied on Bluetooth connectivity to the two pumps.

In conclusion, the use of the BHBP may be better suited for PPD in individuals with HI than current conventional insulin pump therapy. Given the promising results of this pilot study, larger and longer studies using the newer BHBP device will be pursued in this population to establish the long-term benefit and risks of the BHBP.

**Acknowledgments.** The authors would like to thank the participants and their families.

**Funding.** A.R.'s research training was supported by the Children's Hospital of Philadelphia Pediatric Endocrinology Division T32 grant from the National Institute of Diabetes and Digestive and Kidney Diseases (T32DK063688) in 2017–2018 and the Pediatric Endocrinology Society Research Fellowship Award in 2018–2019. This study was funded by grants from the University of Pennsylvania Orphan Disease Center Million Dollar Bike Award; the Children's Hospital of Philadelphia Women's Committee, and the Center for Human Phenomic Science at the Children's Hospital of Philadelphia (National Center for Advancing Translational Sciences award UL1TR001878). Dexcom Inc. supported the study by providing the CGMS used in the study.

The funders of the study had no role in study design, data collection, data analysis, data interpretation, or writing of the manuscript.

**Duality of Interest.** D.D.D.L. has received consulting fees from Zealand Pharma A/S, Crinetics, Poxel Pharma, Hanmi Pharmaceutical, and Soleno Therapeutics; received research funding from Zealand Pharma A/S, Tiburio Therapeutics, and Crinetics; and owns stock options from Merck & Co. E.R.D., and F.H.K. are inventors on patents and patents-pending related to the bionic pancreas technology and are employees, cofounders, and equity holders in Beta Bionics, Inc. S.J.R. is an inventor on patents on aspects of the bionic pancreas that are assigned to Massachusetts General Hospital and are licensed to Beta Bionics; has received honoraria and/or travel expenses for lectures from Novo Nordisk, Roche, and Ascensia; serves on the scientific advisory boards of Unomedical and Companion Medical; has received consulting fees from Beta Bionics, Novo Nordisk, Senseonics, and Flexion Therapeutics; has received grant support from Zealand Pharma A/S, Novo Nordisk, and

Beta Bionics; and has received in-kind support in the form of technical support and/or donation of materials from Zealand Pharma A/S, Ascensia, Senseonics, Adocia, and Tandem Diabetes. No other potential conflicts of interest relevant to this article were reported.

**Author Contributions.** A.R. enrolled, admitted, and managed the subjects with the help of L.M.M. and D.D.D.L., and wrote the first draft of the manuscript. L.M.M. was the clinical research coordinator who helped with enrolling subjects, managing admissions, collecting data, and editing the manuscript. C.A.B. and S.J.R. contributed to study design, trained A.R., L.M.M., and D.D.D.L. on the use of the BHBP, and edited the manuscript. F.H.E.-K. and E.R.D. contributed to study design and edited the manuscript. K.L.L. and C.P.H. oversaw the study when D.D.D.L. was not available and edited the manuscript. L.S.B. analyzed the data and edited the manuscript. D.D.D.L. was responsible for the overall design and conduct of the study and edited the manuscript. D.D.D.L. is the guarantor of this work and, as such, had full access to all

the data in the study and takes responsibility for the integrity of data and the accuracy of data analysis.

**Prior Presentation.** Parts of this study were presented in abstract form at the 79th Scientific Sessions of the American Diabetes Association, San Francisco, CA, 14–18 June 2019.

## References

1. Lord K, Dzata E, Snider KE, Gallagher PR, De León DD. Clinical presentation and management of children with diffuse and focal hyperinsulinism: a review of 223 cases. *J Clin Endocrinol Metab* 2013;98:E1786–E1789
2. Arya VB, Senniappan S, Demirbilek H, et al. Pancreatic endocrine and exocrine function in children following near-total pancreatectomy for diffuse congenital hyperinsulinism. *PLoS One* 2014;9:e98054
3. Bertrand J, Caquard M, Arnoux JB, et al. Glucose metabolism in 105 children and adolescents after pancreatectomy for congenital hyperinsulinism. *Diabetes Care* 2012;35:198–203
4. Welters A, Meissner T, Grulich-Henn J, et al. Characterization of diabetes following pancreatic surgery in patients with congenital hyperinsulinism. *Orphanet J Rare Dis* 2018;13:230
5. Russell SJ, El-Khatib FH, Sinha M, et al. Outpatient glycemic control with a bionic pancreas in type 1 diabetes. *N Engl J Med* 2014;371:313–325
6. El-Khatib FH, Russell SJ, Magyar KL, et al. Autonomous and continuous adaptation of a bihormonal bionic pancreas in adults and adolescents with type 1 diabetes. *J Clin Endocrinol Metab* 2014;99:1701–1711
7. El-Khatib FH, Balliro C, Hillard MA, et al. Home use of a bihormonal bionic pancreas versus insulin pump therapy in adults with type 1 diabetes: a multicentre randomised crossover trial. *Lancet* 2017;389:369–380
8. Russell SJ, Hillard MA, Balliro C, et al. Day and night glycaemic control with a bionic pancreas versus conventional insulin pump therapy in preadolescent children with type 1 diabetes: a randomised crossover trial. *Lancet Diabetes Endocrinol* 2016;4:233–243
